# Supplementary material for: Eutectic solvents and low molecular weight gelators for next-generation supramolecular eutectogels: a sustainable chemistry perspective
Source: Royal Society of Chemistry journal article supplement (doi:10.1039/d3su00264k), 2023-12-01
Supplement: d3su00264k1.pdf [file d3su00264k1.pdf]

## Supplementary Information

### Eutectic solvents and low molecular weight gelators for next-generation supramolecular eutectogels: a sustainable chemistry perspective

Giselle de Araujo Lima e Souza,<sup>a</sup> Maria Enrica Di Pietro <sup>\*a</sup> and Andrea Mele <sup>\*a</sup>

**Table S1.** The twelve principles of Green Chemistry (GCPs).<sup>1</sup>

|       |                                                     |
|-------|-----------------------------------------------------|
| GCP1  | Prevent waste                                       |
| GCP2  | Atom Economy                                        |
| GCP3  | Less Hazardous Synthesis                            |
| GCP4  | Design Benign Chemicals                             |
| GCP5  | Benign Solvents & Auxiliaries                       |
| GCP6  | Design for Energy Efficiency                        |
| GCP7  | Use of Renewable Feedstocks                         |
| GCP8  | Reduce Derivatives                                  |
| GCP9  | Catalysis (vs.Stoichiometric)                       |
| GCP10 | Design for Degradation                              |
| GCP11 | Real-Time Analysis for Pollution Prevention         |
| GCP12 | Inherently Benign Chemistry for Accident Prevention |

**Table S2.** The twelve principles of Green Analytical Chemistry (GAC) and the mnemonic SIGNIFICANCE.<sup>2</sup>

|          |                                                                                                                                  |
|----------|----------------------------------------------------------------------------------------------------------------------------------|
| GAC1     | Direct analytical techniques should be applied to avoid sample treatment.                                                        |
| GAC2     | Minimal sample size and minimal number of samples are goals.                                                                     |
| GAC3     | In situ measurements should be performed.                                                                                        |
| GAC4     | Integration of analytical processes and operations saves energy and reduces the use of reagents.                                 |
| GAC5     | Automated and miniaturized methods should be selected.                                                                           |
| GAC6     | Derivatization should be avoided.                                                                                                |
| GAC7     | Generation of a large volume of analytical waste should be avoided and proper management of analytical waste should be provided. |
| GAC8     | Multi-analyte or multi-parameter methods are preferred versus methods using one analyte at a time.                               |
| GAC9     | The use of energy should be minimized.                                                                                           |
| GAC10    | Reagents obtained from renewable source should be preferred.                                                                     |
| GAC11    | Toxic reagents should be eliminated or replaced.                                                                                 |
| GAC12    | The safety of the operator should be increased.                                                                                  |
| <b>S</b> | <b>Select</b> direct analytical technique                                                                                        |
| <b>I</b> | <b>Integrate</b> analytical processes and operations                                                                             |
| <b>G</b> | <b>Generate</b> as little waste as possible and treat it properly                                                                |
| <b>N</b> | <b>Never</b> waste energy                                                                                                        |
| <b>I</b> | <b>Implement</b> automation and miniaturization of methods                                                                       |
| <b>F</b> | <b>Favor</b> reagents obtained from renewable sources                                                                            |
| <b>I</b> | <b>Increase</b> safety for operator                                                                                              |
| <b>C</b> | <b>Carry out</b> <i>in-situ</i> measurements                                                                                     |
| <b>A</b> | <b>Avoid</b> derivatization                                                                                                      |
| <b>N</b> | <b>Note</b> that the sample number and size should be minimal                                                                    |
| <b>C</b> | <b>Choose</b> multi-analyte or multi-parameter method                                                                            |
| <b>E</b> | <b>Eliminate</b> or replace toxic reagents                                                                                       |

# SUSTAINABLE DEVELOPMENT GOALS

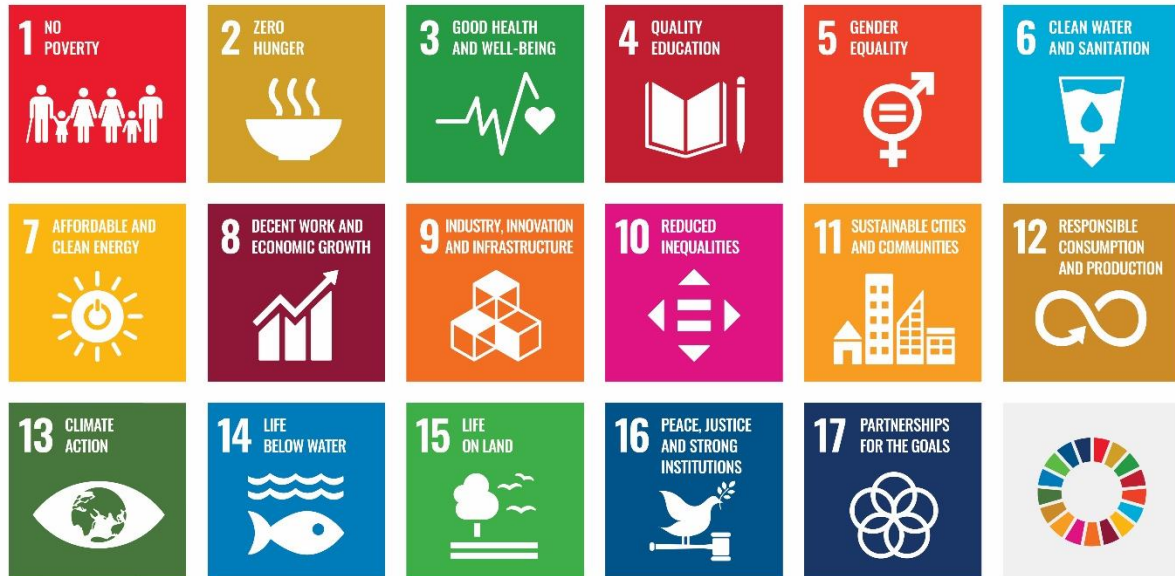

**Figure S1.** The 17 UN Sustainable Development Goals (SDGs) (free download and use for informational purposes <sup>3</sup>).

## References

- [1] P. Anastas and J. Warner, *Green Chemistry: Theory and Practice*, Oxford University Press Inc., Oxford, 1998.
- [2] A. Gałuszka, Z. Migaszewski and J. Namieśnik, The 12 principles of green analytical chemistry and the SIGNIFICANCE mnemonic of green analytical practices, *TrAC - Trends Anal. Chem.*, 2013, **50**, 78–84
- [3] United Nations, Sustainable Development Goals: Communication Materials, <https://www.un.org/sustainabledevelopment/news/communications-material>.
